# Supplementary material
Source: MDPI journal article supplement (https://www.mdpi.com/2624-8549/5/3/115)
Supplement: s1 [file s1]

# Rare Nuclearities and Unprecedented Structural Motifs in Manganese Cluster Chemistry from the Combined Use of Di-2-pyridyl Ketone with Selected Diols

Dedicated to Professor Spyros P. Perlepes, an excellent scientist, great teacher, valuable collaborator, and dear friend, on the occasion of his 70th birthday.

Katerina Skordi,<sup>1</sup> Dimitris I. Alexandropoulos,<sup>1</sup> Adeline D. Fournet,<sup>2†</sup> Nikos Panagiotou,<sup>1</sup> Eleni E. Moushi,<sup>3</sup> Constantina Papatriantafyllopoulou,<sup>1‡</sup> George Christou,<sup>2</sup> Anastasios J. Tasiopoulos<sup>1,\*</sup>

<sup>1</sup> Department of Chemistry, University of Cyprus, 1678 Nicosia, Cyprus.

<sup>2</sup> Department of Chemistry, University of Florida, Gainesville, Florida 32611, USA.

<sup>3</sup> Department of Life Sciences, School of Science, European University Cyprus, 1516 Nicosia, Cyprus

<sup>†</sup> Current address: Intel Corporation, Hillsboro, Oregon 97124, USA

<sup>‡</sup> Current address: School of Biological and Chemical Sciences, College of Science and Engineering, University of Galway, University Road, H91 TK33 Galway, Ireland.

\* Correspondence: [atasio@ucy.ac.cy](mailto:atasio@ucy.ac.cy)

**Table S1.** Crystal data and structural refinement parameters for compounds **1**·2DMF·H<sub>2</sub>O, **2**, **3**·2MeCN, **4** and **5**·DMF.

| Complex                                     | <b>1</b> ·2DMF·H <sub>2</sub> O                                                  | <b>2</b>                                                                         | <b>3</b> ·2MeCN                                                                  | <b>4</b>                                                                       | <b>5</b> ·DMF                                                                     |
|---------------------------------------------|----------------------------------------------------------------------------------|----------------------------------------------------------------------------------|----------------------------------------------------------------------------------|--------------------------------------------------------------------------------|-----------------------------------------------------------------------------------|
| Empirical formula                           | C <sub>82</sub> H <sub>97</sub> N <sub>28</sub> O <sub>38</sub> Mn <sub>11</sub> | C <sub>77</sub> H <sub>85</sub> N <sub>26</sub> O <sub>35</sub> Mn <sub>11</sub> | C <sub>76</sub> H <sub>90</sub> Mn <sub>12</sub> N <sub>16</sub> O <sub>50</sub> | C <sub>46</sub> H <sub>54</sub> N <sub>8</sub> O <sub>18</sub> Mn <sub>4</sub> | C <sub>81</sub> H <sub>77</sub> N <sub>13</sub> O <sub>29</sub> ClMn <sub>7</sub> |
| Formula weight                              | 2687.21                                                                          | 2538.04                                                                          | 2686.91                                                                          | 1226.73                                                                        | 2116.58                                                                           |
| Temperature/K                               | 101(2)                                                                           | 100(2)                                                                           | 100(2)                                                                           | 100(2)                                                                         | 100(2)                                                                            |
| Crystal system                              | orthorhombic                                                                     | orthorhombic                                                                     | monoclinic                                                                       | triclinic                                                                      | monoclinic                                                                        |
| Space group                                 | Pbca                                                                             | Pbca                                                                             | C2/c                                                                             | P-1                                                                            | P2 <sub>1</sub> /c                                                                |
| a/Å                                         | 19.3661(5)                                                                       | 19.716(1)                                                                        | 34.543(3)                                                                        | 9.948 (1)                                                                      | 21.2869(6)                                                                        |
| b/Å                                         | 32.8813(6)                                                                       | 32.7781(9)                                                                       | 20.816(2)                                                                        | 12.322(2)                                                                      | 20.0924(5)                                                                        |
| c/Å                                         | 36.534(1)                                                                        | 36.607(2)                                                                        | 18.708(2)                                                                        | 12.792 (2)                                                                     | 24.9677(7)                                                                        |
| α/°                                         | 90                                                                               | 90                                                                               | 90                                                                               | 106.386(8)                                                                     | 90                                                                                |
| β/°                                         | 90                                                                               | 90                                                                               | 119.72(2)                                                                        | 102.623(8)                                                                     | 110.731(3)                                                                        |
| γ/°                                         | 90                                                                               | 90                                                                               | 90                                                                               | 111.751(9)                                                                     | 90                                                                                |
| Volume/Å <sup>3</sup>                       | 23264 (1)                                                                        | 23657 (2)                                                                        | 11683(2)                                                                         | 1302.2(2)                                                                      | 9987.4(5)                                                                         |
| Z                                           | 8                                                                                | 8                                                                                | 4                                                                                | 1                                                                              | 4                                                                                 |
| ρ <sub>calc</sub> /g/cm <sup>3</sup>        | 1.534                                                                            | 1.425                                                                            | 1.528                                                                            | 1.564                                                                          | 1.408                                                                             |
| μ/mm <sup>-1</sup>                          | 10.125                                                                           | 1.211                                                                            | 1.339                                                                            | 8.403                                                                          | 0.961                                                                             |
| F(000)                                      | 10912.0                                                                          | 10264.0                                                                          | 5432.0                                                                           | 630.0                                                                          | 4312.0                                                                            |
| Crystal size/mm <sup>3</sup>                | 0.09 × 0.046 × 0.014                                                             | 0.09 × 0.046 × 0.014                                                             | 0.09 × 0.046 × 0.014                                                             | 0.09 × 0.046 × 0.014                                                           | 0.09 × 0.046 × 0.014                                                              |
| Radiation                                   | CuKα<br>λ = 1.54184                                                              | MoKα<br>λ = 0.71073                                                              | MoKα<br>λ = 0.71073                                                              | CuKα<br>λ = 1.54184                                                            | MoKα<br>λ = 0.71073                                                               |
| 2θ range for data collection/°              | 6.652 to 133.996                                                                 | 6.164 to 50                                                                      | 5.86 to 50.144                                                                   | 7.73 to 133.994                                                                | 6.426 to 50                                                                       |
|                                             | -18 ≤ h ≤ 23                                                                     | -23 ≤ h ≤ 22                                                                     | -41 ≤ h ≤ 32                                                                     | -10 ≤ h ≤ 11                                                                   | -25 ≤ h ≤ 20                                                                      |
| Index ranges                                | -33 ≤ k ≤ 39                                                                     | -37 ≤ k ≤ 38                                                                     | -24 ≤ k ≤ 17                                                                     | -14 ≤ k ≤ 10                                                                   | -23 ≤ k ≤ 23                                                                      |
|                                             | -43 ≤ l ≤ 25                                                                     | -43 ≤ l ≤ 31                                                                     | -22 ≤ l ≤ 22                                                                     | -15 ≤ l ≤ 14                                                                   | -26 ≤ l ≤ 29                                                                      |
| Reflections collected                       | 52488                                                                            | 79820                                                                            | 24933                                                                            | 7512                                                                           | 48777                                                                             |
| Independent reflections                     | 20705<br>R <sub>int</sub> = 0.0473<br>R <sub>sigma</sub> = 0.0507                | 20629<br>R <sub>int</sub> = 0.0909<br>R <sub>sigma</sub> = 0.0978                | 10301<br>R <sub>int</sub> = 0.0612<br>R <sub>sigma</sub> = 0.0762                | 4615<br>R <sub>int</sub> = 0.0421<br>R <sub>sigma</sub> = 0.0626               | 17553<br>R <sub>int</sub> = 0.0328<br>R <sub>sigma</sub> = 0.0354                 |
| Data/restraints/parameters                  | 20705/16/1356                                                                    | 20629/82/1324                                                                    | 10301/129/732                                                                    | 4615/0/325                                                                     | 17553/81/1180                                                                     |
| Goodness-of-fit on F <sup>2</sup>           | 1.014                                                                            | 0.995                                                                            | 1.089                                                                            | 1.099                                                                          | 1.060                                                                             |
| Final R indexes [I > 2σ (I)]                | R <sub>1</sub> <sup>a</sup> = 0.0805<br>wR <sub>2</sub> <sup>b</sup> = 0.2363    | R <sub>1</sub> = 0.0675<br>wR <sub>2</sub> = 0.1736                              | R <sub>1</sub> = 0.0604<br>wR <sub>2</sub> = 0.1638                              | R <sub>1</sub> = 0.0787<br>wR <sub>2</sub> = 0.2206                            | R <sub>1</sub> = 0.0777<br>wR <sub>2</sub> = 0.1902                               |
| Final R indexes [all data]                  | R <sub>1</sub> = 0.1029<br>wR <sub>2</sub> = 0.2561                              | R <sub>1</sub> = 0.1100<br>wR <sub>2</sub> = 0.1988                              | R <sub>1</sub> = 0.0814<br>wR <sub>2</sub> = 0.1793                              | R <sub>1</sub> = 0.0945<br>wR <sub>2</sub> = 0.2391                            | R <sub>1</sub> = 0.0858<br>wR <sub>2</sub> = 0.1946                               |
| Largest diff. peak/hole / e Å <sup>-3</sup> | 1.94/-1.24                                                                       | 1.19/-1.05                                                                       | 1.98/-1.19                                                                       | 1.19/-1.47                                                                     | 1.23/-1.21                                                                        |

<sup>a</sup>R<sub>1</sub> = Σ(|F<sub>o</sub>| - |F<sub>c</sub>|)/Σ|F<sub>o</sub>|. <sup>b</sup>wR<sub>2</sub> = [Σ[w(F<sub>o</sub><sup>2</sup> - F<sub>c</sub><sup>2</sup>)<sup>2</sup>]/Σ[w(F<sub>o</sub><sup>2</sup>)<sup>2</sup>]<sup>1/2</sup>, w = 1/[σ<sup>2</sup>(F<sub>o</sub><sup>2</sup>) + [(ap)<sup>2</sup> + bp], where p = [max(F<sub>o</sub><sup>2</sup>, 0) + 2F<sub>c</sub><sup>2</sup>]/3.

**Table S2.** Bond valence sum (BVS)<sup>c</sup> calculations for Mn ions in **1-5**.

| Complex 1 |             |             |        |
|-----------|-------------|-------------|--------|
| Atom      | Mn(II)      | Mn(III)     | Mn(IV) |
| Mn1       | <u>1.82</u> | 1.70        | 1.72   |
| Mn2       | 3.19        | <u>2.93</u> | 3.05   |
| Mn3       | 3.09        | <u>2.86</u> | 2.95   |
| Mn4       | <u>2.10</u> | 1.94        | 2.00   |
| Mn5       | <u>2.03</u> | 1.87        | 1.94   |
| Mn6       | <u>1.99</u> | 1.84        | 1.90   |
| Mn7       | <u>1.94</u> | 1.79        | 1.85   |
| Mn8       | 3.14        | <u>2.89</u> | 3.01   |
| Mn9       | 3.26        | <u>3.04</u> | 3.10   |
| Mn10      | 3.25        | <u>2.99</u> | 3.11   |
| Mn11      | <u>1.86</u> | 1.74        | 1.76   |

| Complex 2 |             |             |        |
|-----------|-------------|-------------|--------|
| Atom      | Mn(II)      | Mn(III)     | Mn(IV) |
| Mn1       | <u>1.83</u> | 1.71        | 1.74   |
| Mn2       | 3.25        | <u>2.98</u> | 3.11   |
| Mn3       | <u>1.99</u> | 1.84        | 1.90   |
| Mn4       | 3.12        | <u>2.89</u> | 2.97   |
| Mn5       | <u>2.03</u> | 1.88        | 1.94   |
| Mn6       | <u>2.01</u> | 1.86        | 1.92   |
| Mn7       | <u>1.92</u> | 1.78        | 1.83   |
| Mn8       | 3.16        | <u>2.91</u> | 3.02   |
| Mn9       | 3.28        | <u>3.05</u> | 3.12   |
| Mn10      | 3.20        | <u>2.96</u> | 3.08   |
| Mn11      | <u>1.76</u> | 1.65        | 1.67   |

| Complex 3 |             |         |        |
|-----------|-------------|---------|--------|
| Atom      | Mn(II)      | Mn(III) | Mn(IV) |
| Mn1       | <u>1.88</u> | 1.73    | 1.79   |

|     |             |             |      |
|-----|-------------|-------------|------|
| Mn2 | 3.31        | <u>3.05</u> | 3.16 |
| Mn3 | <u>1.92</u> | 1.78        | 1.84 |
| Mn4 | 3.16        | <u>2.90</u> | 3.04 |
| Mn5 | 3.19        | <u>2.94</u> | 3.05 |
| Mn6 | 3.07        | <u>2.81</u> | 2.95 |

---

| Complex 4 |             |             |        |
|-----------|-------------|-------------|--------|
| Atom      | Mn(II)      | Mn(III)     | Mn(IV) |
| Mn1       | 3.18        | <u>2.93</u> | 3.05   |
| Mn2       | <u>1.91</u> | 1.76        | 1.83   |

---

| Complex 5 |             |             |        |
|-----------|-------------|-------------|--------|
| Atom      | Mn(II)      | Mn(III)     | Mn(IV) |
| Mn1       | 3.30        | <u>3.05</u> | 3.15   |
| Mn2       | <u>2.09</u> | 1.93        | 2.00   |
| Mn3       | 3.26        | <u>3.00</u> | 3.12   |
| Mn4       | 3.30        | <u>3.07</u> | 3.13   |
| Mn5       | 3.28        | <u>3.02</u> | 3.14   |
| Mn6       | <u>1.98</u> | 1.83        | 1.89   |
| Mn7       | 3.26        | <u>3.02</u> | 3.12   |

<sup>c</sup> The underlined value is the one closest to the charge for which it was calculated. The oxidation state is the nearest whole number to the underlined value.

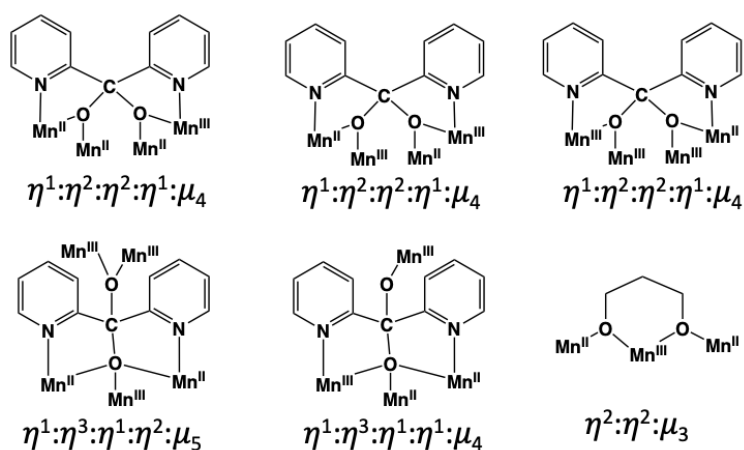

**Scheme S1.** Schematic representation of the coordination modes of  $(py)_2CO_2^{2-}$  and  $pd^{2-}$  ligands in complex 1.

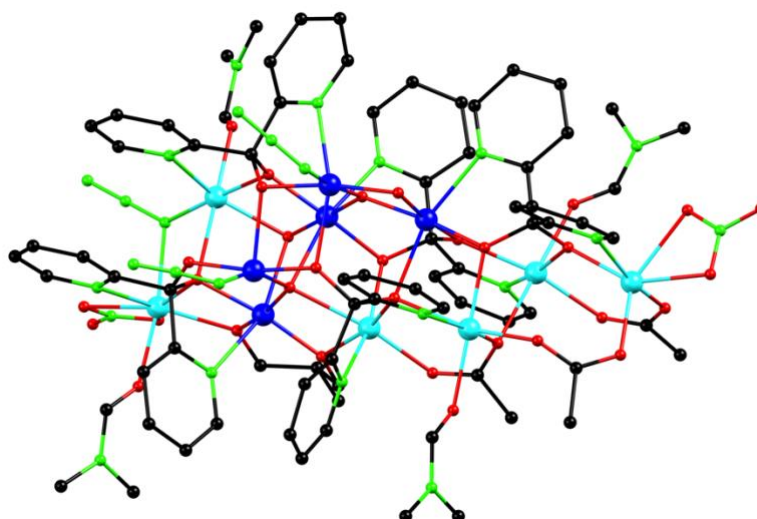

**Figure S1.** Ball and stick representation of the complete structure of **2**. H atoms are omitted for clarity. Colour code: Mn<sup>II</sup>, cyan; Mn<sup>III</sup>, blue; N, green; O, red; C, black.

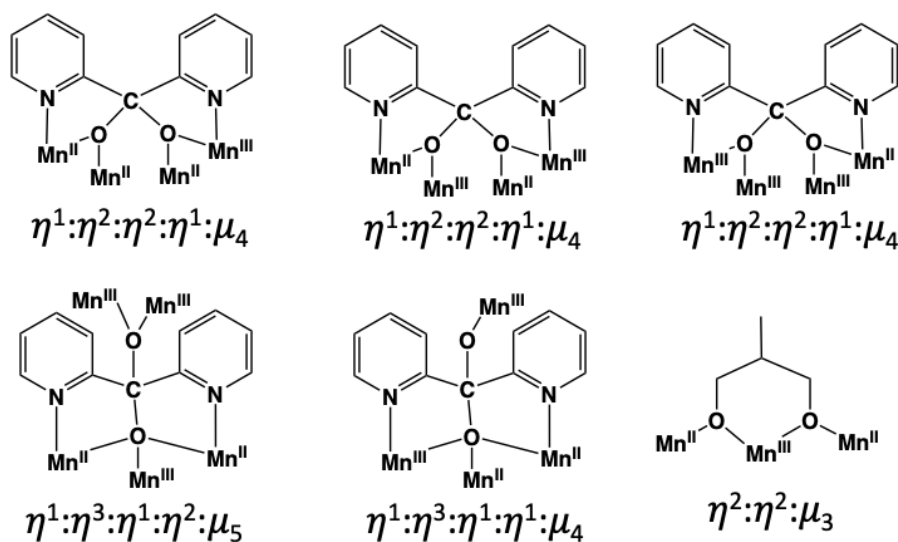

**Scheme S2.** Schematic representation of the coordination modes of (py)<sub>2</sub>CO<sub>2</sub><sup>2-</sup> and pd<sup>2-</sup> ligands in complex **2**.

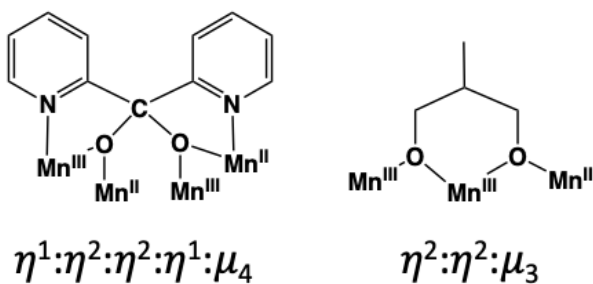

**Scheme S3.** Schematic representation of the coordination modes of (py)<sub>2</sub>CO<sub>2</sub><sup>2-</sup> and mpd<sup>2-</sup> ligands in complex **3**.

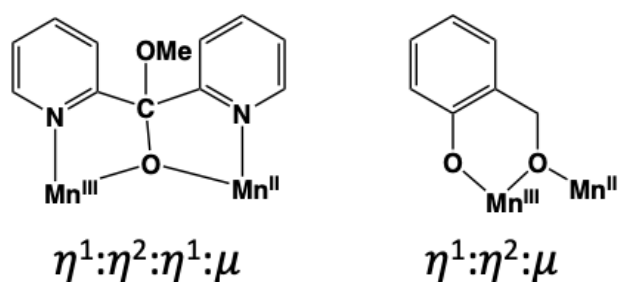

**Scheme S4.** Schematic representation of the coordination modes of  $(\text{py})_2\text{C}(\text{OMe})\text{O}^-$  and  $2\text{-hp}^{2-}$  ligands in complex 4.

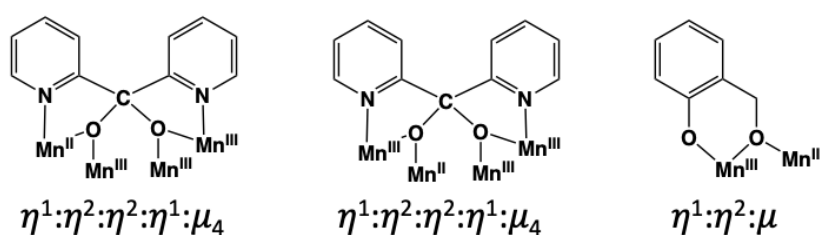

**Scheme S5.** Schematic representation of the coordination modes of  $(\text{py})_2\text{CO}_2^{2-}$  and  $2\text{-hp}^{2-}$  ligands in complex 5.

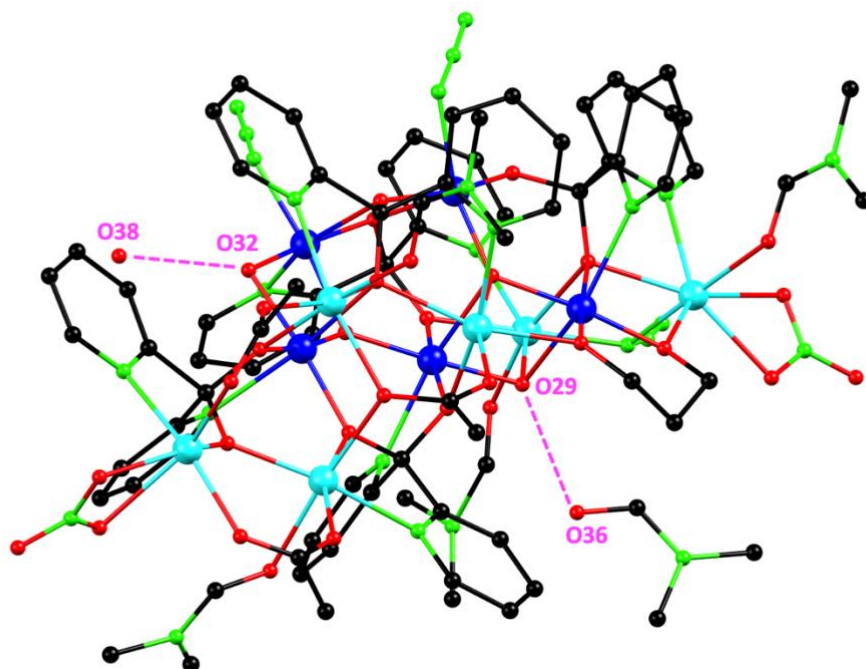

**Figure S2.** Hydrogen bonding in 1, including interactions of a lattice  $\text{H}_2\text{O}$  (O38) molecule with a bridging  $\text{OH}^-$  (O32) anion ( $\text{O38}\cdots\text{O32} = 2.672(2) \text{ \AA}$ ) and an O atom of a lattice DMF molecule (O36) with a bridging  $\text{OH}^-$  (O29) anion ( $\text{O36}\cdots\text{O29} = 2.756(4) \text{ \AA}$ ). Colour code:  $\text{Mn}^{\text{II}}$ , cyan;  $\text{Mn}^{\text{III}}$ , blue; N, green; O, red; C, black. H atoms are omitted for clarity.

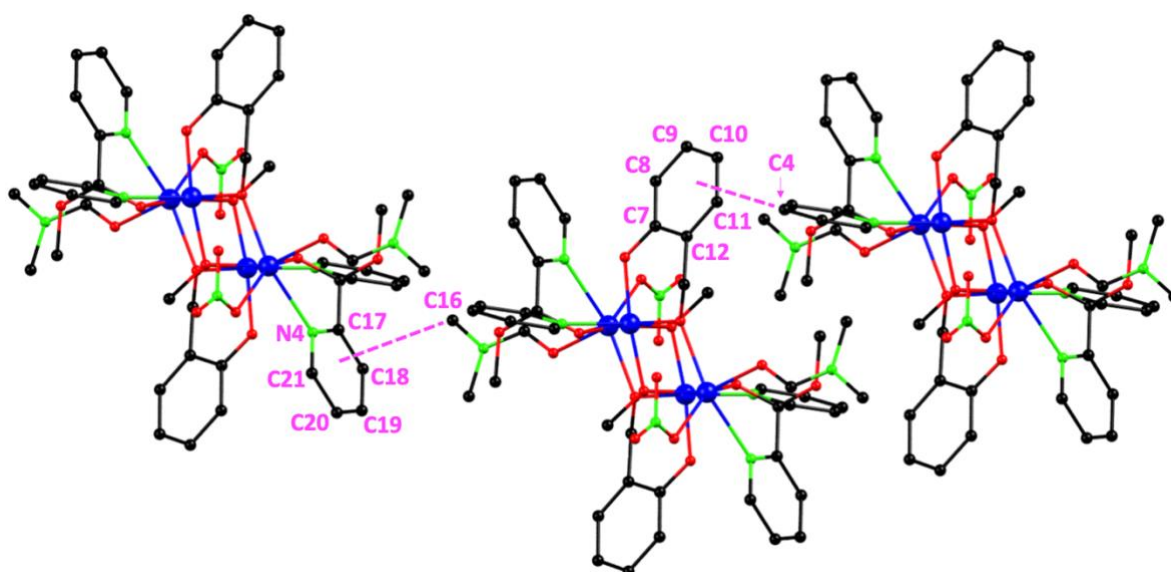

**Figure S3.** Intermolecular CH<sub>3</sub>- $\pi$  interactions between a coordinated DMF (C16) molecule with a pyridyl ring (C17C18C19C20C21N4) of the (py)<sub>2</sub>C(OMe)O<sup>-</sup> ligand (C16...C17C18C19C20C21N4 = 3.677(9) Å), and T-shaped  $\pi$ - $\pi$  stacking between a pyridyl ring (C4) of (py)<sub>2</sub>C(OMe)O<sup>-</sup> ligand and a phenolic ring (C7C8C9C10C11C12) of 2-hp<sup>2-</sup> anion (C4...C7C8C9C10C11C12 = 3.555(9) Å) in **4**. Colour code: Mn<sup>II</sup>, cyan; Mn<sup>III</sup>, blue; N, green; O, red; C, black. H atoms are omitted for clarity.

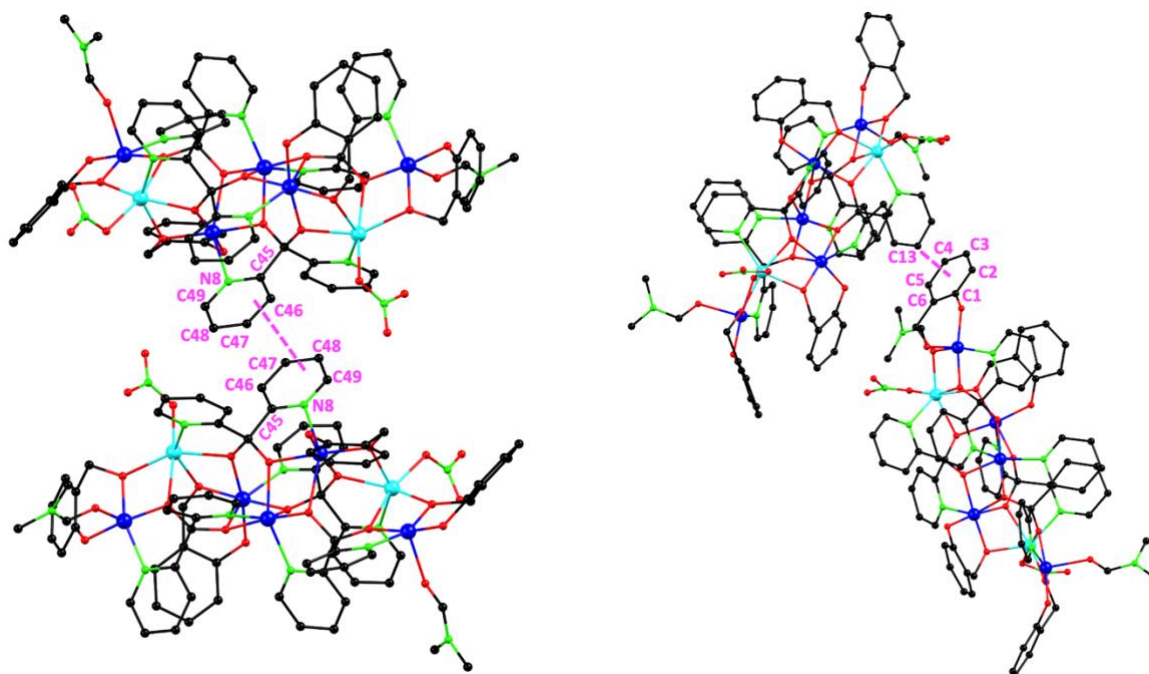

**Figure S4.** Intermolecular  $\pi$ - $\pi$  stacking in **5**, including interactions (left) of the pyridyl rings (C45C46C47C48C49N8) of (py)<sub>2</sub>CO<sub>2</sub><sup>2-</sup> anions (C45C46C47C48C49N8...C45C46C47C48C49N8 = 3.745(9) Å), and (right) of a pyridyl ring (C13) of (py)<sub>2</sub>CO<sub>2</sub><sup>2-</sup> and a phenolic ring (C1C2C3C4C5C6) of 2-hp<sup>2-</sup> anions (C13...C1C2C3C4C5C6 = 3.868(9) Å) of two adjacent cations of **5**. Colour code: Mn<sup>II</sup>, cyan; Mn<sup>III</sup>, blue; N, green; O, red; C, black. H atoms are omitted for clarity.

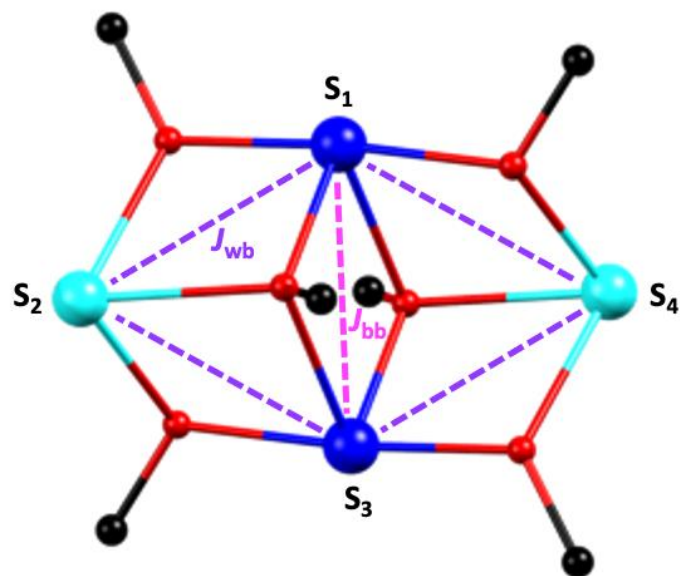

**Figure S5.**  $J$ -coupling scheme employed for the elucidation of magnetic exchange interactions in **4**.

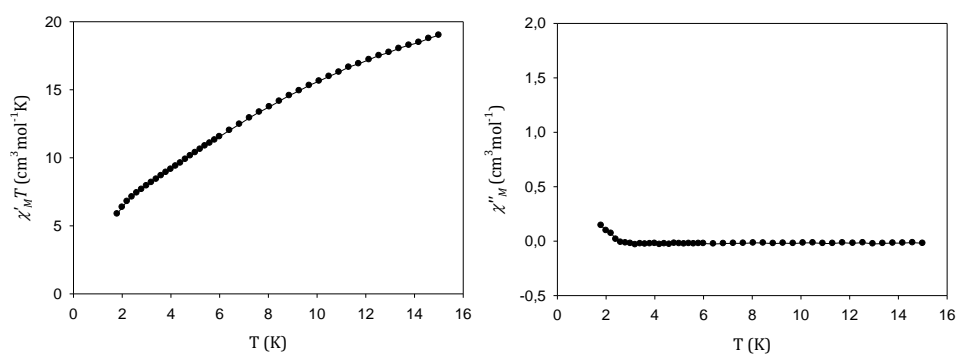

**Figure S6.** Temperature dependence of the in-phase  $\chi'_M T$  product (left) and out-of-phase  $\chi''_M$  (right) ac susceptibility signal of **3** in a 3.5 G field oscillating at 1000 Hz frequency.

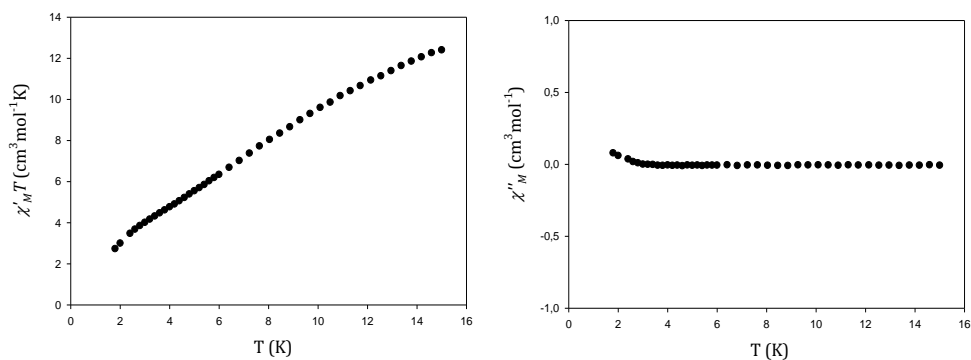

**Figure S7.** Temperature dependence of the in-phase  $\chi'_M T$  product (left) and out-of-phase  $\chi''_M$  (right) ac susceptibility signal of **4** in a 3.5 G field oscillating at 1000 Hz frequency.



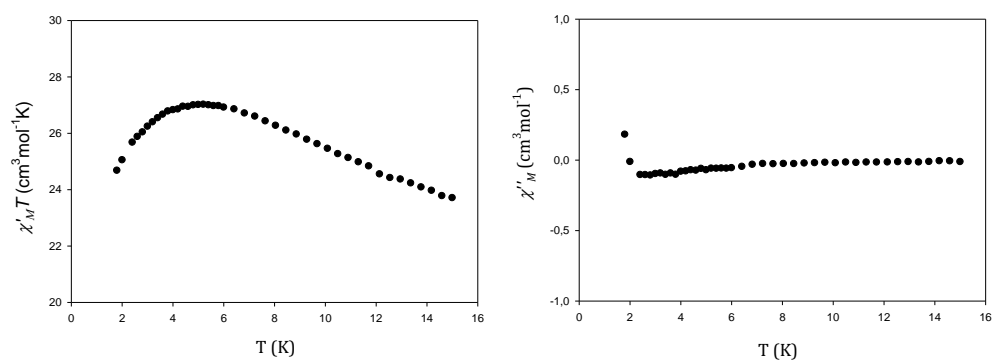

**Figure S8.** Temperature dependence of the in-phase  $\chi'_M T$  product (left) and out-of-phase  $\chi''_M$  (right) ac susceptibility signal of **5** in a 3.5 G field oscillating at 1000 Hz frequency.
